# Supplementary material for: Effects of sedentary behaviour interventions on biomarkers of cardiometabolic risk in adults: systematic review with meta-analyses
Source: PubMed Central journal article supplement (PMC7841485; doi:10.1136/bjsports-2019-101154), 2020-04-08
Supplement: bjsports-2019-101154supp001.pdf [file bjsports-2019-101154supp001.pdf]

**Supplemental Material S1** Searches performed for Ovid MEDLINE(R) In-Process & Other Non-Indexed Citations, Ovid MEDLINE(R)

| #  | Searches                                                                                                                                                                                     | Results <sup>a</sup> |
|----|----------------------------------------------------------------------------------------------------------------------------------------------------------------------------------------------|----------------------|
| 1  | Sedentary Lifestyle/ or Television/ or Computers/ or Video Games/                                                                                                                            | 0                    |
| 2  | (sitting or sedentary).tw.                                                                                                                                                                   | 5374                 |
| 3  | ((reclining or lying) adj4 (time* or bout* or posture* or position*1)).tw.                                                                                                                   | 264                  |
| 4  | ((screen or screens or screenbased or TV or television* or computer* or device* or smartphone* or phone* or tablet* or ipad* or DVD or video*) adj4 (time* or hours or watch* or view*)).tw. | 4377                 |
| 5  | ((computer* or internet*) adj ("use" or "usage" or "usage" or behavior?r*)).tw.                                                                                                              | 543                  |
| 6  | ((reading or gaming) adj3 time*).tw.                                                                                                                                                         | 276                  |
| 7  | ((videogam* or video game* or computer game* or electronic game*) adj5 (time* or bout* or hours or watch* or view*)).tw.                                                                     | 103                  |
| 8  | Automobile Driving/                                                                                                                                                                          | 0                    |
| 9  | ((car or cars or automobile* or driving or commute* or commuting) adj3 time*).tw.                                                                                                            | 254                  |
| 10 | (physical* adj3 inactiv*).tw.                                                                                                                                                                | 1158                 |
| 11 | ((inactive or inactivity) adj3 (time* or bout* or hours)).tw.                                                                                                                                | 102                  |
| 12 | (low adj2 energy expenditure*).tw.                                                                                                                                                           | 34                   |
| 13 | (low adj2 physical activity*).tw.                                                                                                                                                            | 357                  |
| 14 | or/1-13                                                                                                                                                                                      | 11977                |
| 15 | ((cardiovascular or cardiometabolic or cardio-metabolic) adj2 risk*).tw.                                                                                                                     | 10453                |
| 16 | (metaboli* or dysmetaboli*).tw.                                                                                                                                                              | 92550                |
| 17 | body mass index/ or exp overweight/ or waist circumference/ or waist-hip ratio/                                                                                                              | 0                    |
| 18 | Body Weight/ or Weight Loss/ or Weight Gain/ or exp Adipose Tissue/ or Adiposity/ or body composition/ or body fat distribution/                                                             | 0                    |
| 19 | exp Blood Pressure/ or exp Proinsulin/ or exp Adipokines/ or exp Somatomedins/ or exp Lipids/                                                                                                | 0                    |
| 20 | Hemoglobin A, Glycosylated/ or Biological Markers/                                                                                                                                           | 0                    |
| 21 | C-Reactive Protein/ or Tumor Necrosis Factor-alpha/ or Interleukin-6/ or exp Fibrinogen/                                                                                                     | 0                    |
| 22 | (glycosuria* or hyperglyc?emi* or hyperinsulin* or hypertensi* or prehypertensi*).tw.                                                                                                        | 37777                |
| 23 | (glucose or blood sugar* or glyco* or glyca* or glyce*).tw.                                                                                                                                  | 79568                |
| 24 | (overweight or over-weight or obesity or obese or BMI or body mass index or body mass indicator*).tw.                                                                                        | 49646                |
| 25 | (waist circumference* or waist-hip ratio* or adiposity or adipose or fatty tissue*).tw.                                                                                                      | 13449                |
| 26 | (weight adj1 (gain* or increase* or loss* or decrease* or reduc* or lose* or losing or fluctuat*)).tw.                                                                                       | 16489                |
| 27 | (body adj (fat or composition or weight)).tw.                                                                                                                                                | 20018                |
| 28 | (blood pressure or diastolic or systolic).tw.                                                                                                                                                | 27762                |
| 29 | (proinsulin* or insulin* or c-peptide* or adiponectin* or leptin* or resistin* or somatomedin*).tw.                                                                                          | 28561                |
| 30 | (lipid* or triglycerid* or triacylglycerol* or lipoprotein* or apolipoprotein* or apoprotein* or chylomicron* or diglycerid* or diacylglycerol*).tw.                                         | 49109                |
| 31 | (dyslipid* or dyslipoprotein* or hyperlipid* or hyperlip?emi* or lip?emi* or lipid?emi* or hypercholesterol* or hyperlipoprotein* or hypertryglycerid*).tw.                                  | 8511                 |
| 32 | (HDL or LDL or VLDL or cholesterol*).tw.                                                                                                                                                     | 19137                |

|    |                                                                                                                             |        |
|----|-----------------------------------------------------------------------------------------------------------------------------|--------|
| 33 | (biologic* marker* or biomarker* or immun* marker* or biochemical marker*).tw.                                              | 34917  |
| 34 | (c-reactive or crp or fibrin* or hscrp or homocystein*).tw.                                                                 | 14516  |
| 35 | (il6 or il-6 or interleukin-6 or tumor necrosis factor alpha or tnf-a or tnf-alpha).tw.                                     | 19760  |
| 36 | ((glycate* or glycosylate*) adj2 (hemoglobin* or haemoglobin*)).tw.                                                         | 2598   |
| 37 | (hb a1* or hba1*).tw.                                                                                                       | 4575   |
| 38 | (HOMA or homeosta* model assessment*).tw.                                                                                   | 2421   |
| 39 | or/15-38                                                                                                                    | 334401 |
| 40 | movement/ or locomotion/ or walking/ or motor activity/ or exercise/ or resistance training/                                | 0      |
| 41 | physical exertion/ or physical fitness/                                                                                     | 0      |
| 42 | accelerometry/ or actigraphy/                                                                                               | 0      |
| 43 | (acceleromet* or accelero-met* or pedomet* or inclinomet* or actigraph* or acti-graph* or actimet* or acti-met*).tw.        | 3271   |
| 44 | ((activit* or movement* or motion or fitness) adj2 (monitor* or assess* or measure* or track* or sensor*)).tw.              | 10370  |
| 45 | (physical* adj2 (fit* or activ* or train*)).tw.                                                                             | 14689  |
| 46 | (ambulation* or ambulatory activit* or walk or walking).tw.                                                                 | 12556  |
| 47 | ((light or moderate or intensity) adj2 activit*).tw.                                                                        | 2040   |
| 48 | (step or steps or stepping).tw.                                                                                             | 76852  |
| 49 | (sit-stand* or stand-step* or standing).tw.                                                                                 | 10846  |
| 50 | (GT1M or GT3X or GT3X+ or activPAL or Fitbit or GENEactiv or Jawbone or LUMObac or Fuelband or Omron).tw.                   | 413    |
| 51 | (Actiheart or Actical or Movemonitor or Tractivity or Yamax or Sensewear or Misfit or IDEEA or DirectLife or SmartShoe).tw. | 700    |
| 52 | (3dNX or ADXL322 or DynaPort MiniMod or EGAS device or GENE or Minimod or RT3 device).tw.                                   | 9      |
| 53 | (Digi-Walker or Caltrac or RT3 triaxial or Tracmor2 or Lifecorder or Walk4Life).tw.                                         | 13     |
| 54 | (StepWatch or TriTrac or Axivity or BioTrainer or Activ Tracer or ActiWatch or ActivTracer or Mini-Motionlogger).tw.        | 54     |
| 55 | or/40-54                                                                                                                    | 122156 |
| 56 | (randomized controlled trial or controlled clinical trial).pt.                                                              | 307    |
| 57 | (random* or quasirandom* or trial or placebo).tw. or clinical trial*.sh.                                                    | 156307 |
| 58 | cross-over studies/ or (cross-over or crossover).tw.                                                                        | 9949   |
| 59 | or/56-58                                                                                                                    | 162180 |
| 60 | 14 and 39 and 55 and 59                                                                                                     | 402    |
| 61 | exp animals/ not humans.sh.                                                                                                 | 1      |
| 62 | 60 not 61                                                                                                                   | 402    |
| 63 | limit 62 to english language                                                                                                | 399    |

<sup>a</sup>Results are displayed for the initial search (March 03 2017). Identical searches were performed, ultimately covering research up to February 16 2018.
