# Supplementary material for: Effects of sedentary behaviour interventions on biomarkers of cardiometabolic risk in adults: systematic review with meta-analyses
Source: PubMed Central journal article supplement (PMC7841485; doi:10.1136/bjsports-2019-101154), 2020-04-08
Supplement: bjsports-2019-101154supp004.pdf [file bjsports-2019-101154supp004.pdf]

**Supplementary Table S6** Individual study risk of bias assessment for 1) anthropometric and blood pressure, 2) glucose, and; 3) lipid measures.

| No.   | Study              | Bias arising from the randomisation process |    |    | Bias due to deviations from intended intervention |    |    | Bias due to missing outcome data |    |    | Bias in measurement of the outcome |    |    | Bias in selection of the reported result |    |    | Overall bias |    |    |
|-------|--------------------|---------------------------------------------|----|----|---------------------------------------------------|----|----|----------------------------------|----|----|------------------------------------|----|----|------------------------------------------|----|----|--------------|----|----|
|       |                    | 1                                           | 2  | 3  | 1                                                 | 2  | 3  | 1                                | 2  | 3  | 1                                  | 2  | 3  | 1                                        | 2  | 3  | 1            | 2  | 3  |
|       | <i>Measure</i>     |                                             |    |    |                                                   |    |    |                                  |    |    |                                    |    |    |                                          |    |    |              |    |    |
| 1     | Aadahl 2014        | +                                           | +  | +  | +                                                 | +  | +  | ?                                | ?  | ?  | +                                  | +  | +  | +                                        | +  | +  | ?            | ?  | ?  |
| 2     | Alkhajah 2012      | -                                           | -  | -  | +                                                 | +  | +  | ?                                | -  | -  | +                                  | +  | +  | +                                        | +  | +  | -            | -  | -  |
| 3     | Ashe 2015          | ?                                           |    |    | ?                                                 |    |    | ?                                |    |    | +                                  |    |    | +                                        |    |    | ?            |    |    |
| 4     | Balducci, 2019*    | +                                           | +  | +  | +                                                 | +  | +  | +                                | +  | +  | +                                  | +  | +  | -                                        | -  | +  | -            | -  | +  |
| 5     | Biddle 2015        | +                                           | +  | +  | +                                                 | +  | +  | ?                                | ?  | ?  | +                                  | +  | +  | +                                        | +  | +  | ?            | ?  | ?  |
| 6     | Butler 2018        | ?                                           | ?  | ?  | -                                                 | -  | -  | +                                | +  | +  | ?                                  | +  | +  | +                                        | +  | ?  | -            | -  | -  |
| 7     | Carr 2013          | +                                           |    | +  | +                                                 |    | +  | ?                                |    | ?  | +                                  |    | +  | ?                                        |    | +  | ?            |    | ?  |
| 8     | Danquah 2017       | +                                           |    |    | +                                                 |    |    | +                                |    |    | +                                  |    |    | +                                        |    |    | +            |    |    |
| 9     | Dunning, 2018      | +                                           | +  | +  | ?                                                 | ?  | ?  | +                                | +  | +  | ?                                  | ?  | ?  | +                                        | +  | +  | ?            | ?  | ?  |
| 10    | Garland, 2018      | -                                           |    |    | +                                                 |    |    | -                                |    |    | -                                  |    |    | +                                        |    |    | -            |    |    |
| 11    | Graves 2015        | +                                           | +  | +  | +                                                 | +  | +  | +                                | +  | +  | +                                  | +  | +  | ?                                        | ?  | ?  | ?            | ?  | ?  |
| 12    | Healy 2013         | -                                           | -  | -  | +                                                 | +  | +  | +                                | +  | +  | +                                  | +  | +  | +                                        | +  | +  | -            | -  | -  |
| 13    | Healy 2017         | +                                           | +  | +  | +                                                 | +  | +  | ?                                | ?  | ?  | +                                  | +  | +  | +                                        | +  | +  | ?            | ?  | ?  |
| 14    | Kallings 2009      | ?                                           | ?  | ?  | +                                                 | +  | +  | +                                | +  | +  | +                                  | +  | +  | +                                        | +  | +  | ?            | ?  | ?  |
| 15    | Kozey Keadle 2014  | -                                           | -  | -  | -                                                 | -  | -  | ?                                | ?  | ?  | +                                  | +  | +  | +                                        | +  | +  | -            | -  | -  |
| 16    | Lin 2017           | ?                                           | ?  | ?  | +                                                 | +  | +  | ?                                | ?  | ?  | +                                  | +  | +  | +                                        | +  | +  | ?            | ?  | ?  |
| 17    | Lyons 2017         | +                                           |    |    | +                                                 |    |    | +                                |    |    | +                                  |    |    | +                                        |    |    | +            |    |    |
| 18    | MacEwen 2017       | +                                           | +  | +  | -                                                 | -  | -  | ?                                | ?  | ?  | +                                  | +  | +  | +                                        | +  | +  | -            | -  | -  |
| 19    | Mainsbridge 2014   | ?                                           |    |    | +                                                 |    |    | +                                |    |    | ?                                  |    |    | ?                                        |    |    | ?            |    |    |
| 20    | Malaeb, 2019       | -                                           |    |    | -                                                 |    |    | -                                |    |    | ?                                  |    |    | -                                        |    |    | -            |    |    |
| 21    | Mantzari, 2018     | ?                                           | ?  | ?  | ?                                                 | ?  | ?  | +                                | +  | +  | +                                  | +  | +  | +                                        | +  | +  | ?            | ?  | ?  |
| 22    | Maxwell-Smith 2019 | ?                                           |    |    | +                                                 |    |    | +                                |    |    | +                                  |    |    | +                                        |    |    | ?            |    |    |
| 23    | Maylor, 2018       | +                                           |    | +  | ?                                                 |    | ?  | +                                |    | +  | ?                                  |    | ?  | +                                        |    | +  | ?            |    | ?  |
| 24    | Miyamoto 2017      | +                                           | +  | +  | +                                                 | +  | +  | +                                | +  | +  | +                                  | +  | +  | +                                        | +  | +  | +            | +  | +  |
| 25    | Pesola 2017        | +                                           | +  | +  | +                                                 | +  | +  | +                                | +  | +  | +                                  | +  | +  | +                                        | +  | +  | +            | +  | +  |
| 26    | Peterman, 2019     | ?                                           | ?  | ?  | +                                                 | +  | +  | -                                | -  | -  | ?                                  | +  | +  | -                                        | -  | -  | -            | -  | -  |
| 27    | Puig-Ribera 2015   | ?                                           |    |    | +                                                 |    |    | ?                                |    |    | +                                  |    |    | +                                        |    |    | ?            |    |    |
| 28    | Resendiz, 2019     | ?                                           |    |    | ?                                                 |    |    | +                                |    |    | ?                                  |    |    | +                                        |    |    | ?            |    |    |
| 29    | Schuna 2014        | ?                                           |    |    | +                                                 |    |    | +                                |    |    | +                                  |    |    | +                                        |    |    | ?            |    |    |
| 30    | Taylor 2016        | ?                                           | ?  | ?  | ?                                                 | ?  | ?  | ?                                | ?  | ?  | ?                                  | ?  | ?  | +                                        | +  | +  | ?            | ?  | ?  |
| 31    | Thomsen 2016       | +                                           | +  | +  | +                                                 | +  | +  | +                                | +  | +  | +                                  | +  | +  | +                                        | +  | +  | +            | +  | +  |
| 32    | Thomsen 2017       | +                                           | +  | +  | +                                                 | +  | +  | +                                | +  | +  | +                                  | +  | +  | +                                        | +  | +  | +            | +  | +  |
| 33    | Zhu, 2018          | -                                           | -  | -  | +                                                 | +  | +  | -                                | -  | -  | ?                                  | +  | +  | +                                        | +  | +  | -            | -  | -  |
| Total | Low Risk (+)       | 15                                          | 11 | 13 | 23                                                | 15 | 16 | 18                               | 11 | 12 | 23                                 | 19 | 20 | 27                                       | 18 | 20 | 6            | 4  | 5  |
| Total | Unclear risk (?)   | 12                                          | 6  | 6  | 6                                                 | 3  | 4  | 11                               | 7  | 8  | 9                                  | 2  | 3  | 3                                        | 1  | 2  | 17           | 9  | 11 |
| Total | High risk (-)      | 6                                           | 4  | 4  | 4                                                 | 3  | 3  | 4                                | 3  | 3  | 1                                  | 0  | 0  | 3                                        | 2  | 1  | 10           | 8  | 7  |
| Total | All                | 33                                          | 21 | 23 | 33                                                | 21 | 23 | 33                               | 21 | 23 | 33                                 | 21 | 23 | 33                                       | 21 | 23 | 33           | 21 | 23 |

**Notes:** 1=anthropometry & blood pressure outcomes; 2=glucose metabolism outcomes; 3=lipid metabolism outcomes; + = low risk of bias; ? = unclear risk of bias (some concerns); - = high risk of bias.

\* Data were extracted from the earlier paper related to this study (Balducci 2017) when it was not reported in the 2019 paper (%BF; FFM; BMI; fasting insulin; HOMA). Risk of bias for Balducci 2017 was low for all criteria.
