# Supplementary material for: Effects of sedentary behaviour interventions on biomarkers of cardiometabolic risk in adults: systematic review with meta-analyses
Source: PubMed Central journal article supplement (PMC7841485; doi:10.1136/bjsports-2019-101154), 2020-04-08
Supplement: bjsports-2019-101154supp006.pdf [file bjsports-2019-101154supp006.pdf]

**Supplemental Table S7** Assumption tests regarding publication bias

| Outcome                            | Begg's test            |
|------------------------------------|------------------------|
| Weight, kg                         | $z = -0.21, p = 0.870$ |
| Body Mass Index, kg/m <sup>2</sup> | $z = -0.57, p = 0.602$ |
| Waist circumference, cm            | $z = 1.40, p = 0.162$  |
| Body fat, % of body weight         | $z = 0.68, p = 0.499$  |
| Fat mass, kg                       | $z = 1.13, p = 0.260$  |
| Fat-free mass, kg                  | $z = -1.20, p = 0.368$ |
| Systolic BP, mmHg                  | $z = -0.49, p = 0.657$ |
| Diastolic BP, mmHg                 | $z = -1.38, p = 0.183$ |
| Glucose, mM                        | $z = 0.70, p = 0.484$  |
| Insulin, pM                        | $z = 0.36, p = 0.721$  |
| HbA1c, %                           | $z = -0.52, p = 0.754$ |
| Total cholesterol, mM              | $z = -0.71, p = 0.509$ |
| HDL cholesterol, mM                | $z = 0.08, p = 0.932$  |
| LDL cholesterol, mM                | $z = -0.68, p = 0.538$ |
| Triglycerides, mM                  | $z = 1.35, p = 0.177$  |
