# Supplementary material for: Effects of sedentary behaviour interventions on biomarkers of cardiometabolic risk in adults: systematic review with meta-analyses
Source: PubMed Central journal article supplement (PMC7841485; doi:10.1136/bjsports-2019-101154), 2020-04-08

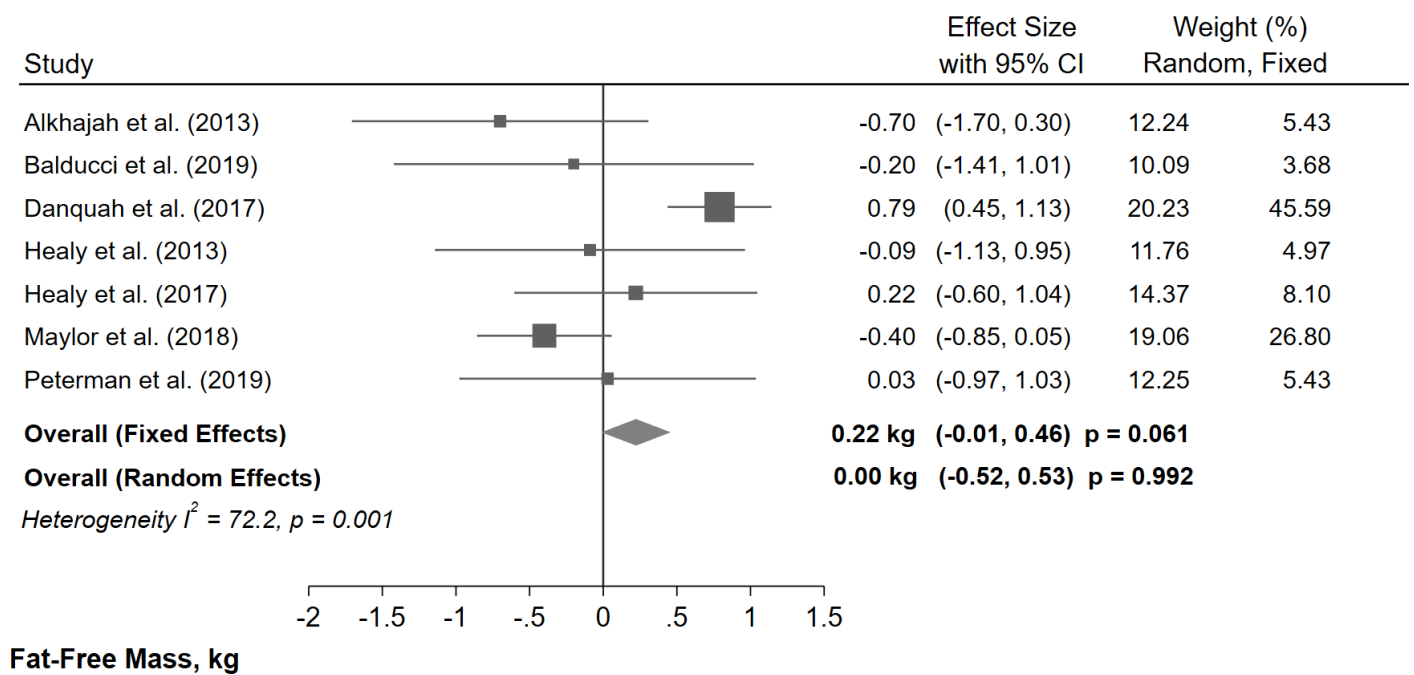

Supplement: bjsports-2019-101154supp012.pdf [file bjsports-2019-101154supp012.pdf]
