# Supplementary material for: Effects of sedentary behaviour interventions on biomarkers of cardiometabolic risk in adults: systematic review with meta-analyses
Source: PubMed Central journal article supplement (PMC7841485; doi:10.1136/bjsports-2019-101154), 2020-04-08
Supplement: bjsports-2019-101154supp013.pdf [file bjsports-2019-101154supp013.pdf]

**Table S8:** Meta-regression: associations of study characteristics with intervention effects on cardiometabolic biomarkers displaying low heterogeneity

|                                      | Unadjusted      |                      |       |                       | Age adjusted    |                     |       |                       |
|--------------------------------------|-----------------|----------------------|-------|-----------------------|-----------------|---------------------|-------|-----------------------|
|                                      | k, N            | b (95% CI)           | p     | I <sup>2</sup> , p    | n, N            | b (95% CI)          | p     | I <sup>2</sup> , p    |
| <b>Weight (kg)</b>                   | <b>25, 1839</b> |                      |       | <b>23.6%, p=0.142</b> | <b>25, 1839</b> |                     |       | <b>23.6%, p=0.142</b> |
| Mean baseline age, per 10 y          | 25, 1839        | -0.51 (-0.84, -0.18) | 0.002 | 0.0%, p = 0.504       |                 | -                   | -     | -                     |
| Mean baseline BMI, kg/m <sup>2</sup> | 25, 1839        | -0.02 (-0.15, 0.10)  | 0.731 | 26.6%, p = 0.115      | 25, 1839        | 0.03 (-0.07, 0.12)  | 0.579 | 0.0%, p = 0.462       |
| Mean baseline level                  | 25, 1839        | 0.00 (-0.04, 0.05)   | 0.873 | 26.8%, p = 0.113      | 25, 1839        | 0.02 (-0.01, 0.05)  | 0.313 | 0.0%, p = 0.505       |
| Sedentary effectiveness, h/day       | 25, 1839        | -0.17 (-0.84, 0.50)  | 0.625 | 26.6%, p = 0.115      | 25, 1839        | -0.14 (-0.61, 0.33) | 0.565 | 0.0%, p = 0.463       |
| Duration (vs ≤3 months)              | 25, 1839        |                      | 0.036 | 28.0%, p = 0.106      | 25, 1839        |                     | 0.009 | 2.4%, p = 0.428       |
| 3–6 months                           |                 | -1.26 (-2.25, -0.27) | 0.012 |                       |                 | -0.60 (-1.47, 0.26) | 0.173 |                       |
| >6 months                            |                 | -0.00 (-1.15, 1.15)  | 0.997 |                       |                 | 0.25 (-0.66, 1.15)  | 0.591 |                       |
| Risk of bias (vs High risk)          | 25, 1839        |                      | 0.640 | 29.1%, p = 0.096      | 25, 1839        |                     | 0.020 | 5.6%, p = 0.385       |
| Some concerns                        |                 | -0.47 (-1.85, 0.91)  | 0.507 |                       |                 | 0.67 (-0.69, 2.03)  | 0.335 |                       |
| Low risk                             |                 | -0.43 (-1.37, 0.51)  | 0.366 |                       |                 | 0.17 (-0.66, 1.00)  | 0.692 |                       |
| <b>Body fat percentage, %</b>        | <b>16, 1618</b> |                      |       | <b>5.5%, p=0.390</b>  | <b>16, 1618</b> |                     |       | <b>5.5%, p=0.390</b>  |
| Mean baseline age, per 10 y          | 16, 1618        | -0.13 (-0.38, 0.13)  | 0.325 | 6.5%, p = 0.380       |                 | -                   | -     | -                     |
| Mean baseline BMI, kg/m <sup>2</sup> | 16, 1618        | -0.04 (-0.13, 0.05)  | 0.397 | 8.5%, p = 0.358       | 16, 1618        | -0.02 (-0.14, 0.10) | 0.732 | 13.0%, p = 0.311      |
| Mean baseline level                  | 16, 1618        | -0.04 (-0.10, 0.01)  | 0.130 | 0.0%, p = 0.482       | 16, 1618        | -0.04 (-0.11, 0.03) | 0.238 | 3.9%, p = 0.408       |
| Sedentary effectiveness, h/day       | 16, 1618        | -0.21 (-0.75, 0.34)  | 0.456 | 8.9%, p = 0.354       | 16, 1618        | -0.31 (-0.88, 0.25) | 0.274 | 5.8%, p = 0.388       |
| Duration (vs ≤3 months)              | 16, 1618        |                      | 0.194 | 16.2%, p = 0.276      | 16, 1618        |                     | 0.257 | 12.1%, p = 0.323      |
| 3–6 months                           |                 | -0.56 (-1.19, 0.06)  | 0.078 |                       |                 | -0.48 (-1.11, 0.16) | 0.143 |                       |
| >6 months                            |                 | -0.06 (-0.77, 0.66)  | 0.880 |                       |                 | 0.11 (-0.67, 0.89)  | 0.786 |                       |
| Risk of bias (vs High risk)          | 16, 1618        |                      | 0.209 | 16.3%, p = 0.276      | 16, 1618        |                     | 0.332 | 17.5%, p = 0.267      |
| Some concerns                        |                 | -0.76 (-1.61, 0.09)  | 0.081 |                       |                 | -0.68 (-1.57, 0.21) | 0.132 |                       |
| Low risk                             |                 | -0.51 (-1.38, 0.35)  | 0.243 |                       |                 | -0.44 (-1.34, 0.45) | 0.331 |                       |
| <b>Fat mass, kg</b>                  | <b>6, 724</b>   |                      |       | <b>26.6%, p=0.235</b> | <b>6, 724</b>   |                     |       | <b>26.6%, p=0.235</b> |
| Mean baseline age, per 10 y          | 6, 724          | -0.22 (-0.64, 0.19)  | 0.296 | 26.7%, p = 0.243      |                 | -                   | -     | -                     |
| Mean baseline BMI, kg/m <sup>2</sup> | 6, 724          | -0.12 (-0.30, 0.06)  | 0.179 | 17.1%, p = 0.306      | 6, 724          | -0.10 (-0.34, 0.14) | 0.416 | 35.4%, p = 0.200      |

|                                      |                 |                     |       |                       |                 |                     |       |                       |
|--------------------------------------|-----------------|---------------------|-------|-----------------------|-----------------|---------------------|-------|-----------------------|
| Mean baseline level                  | 6, 724          | -0.08 (-0.18, 0.01) | 0.082 | 0.0%, p = 0.436       | 6, 724          | -0.09 (-0.22, 0.05) | 0.212 | 20.6%, p = 0.286      |
| Sedentary effectiveness, h/day       | 6, 724          | -0.67 (-1.71, 0.36) | 0.202 | 22.8%, p = 0.269      | 6, 724          | -0.78 (-1.72, 0.16) | 0.104 | 0.0%, p = 0.422       |
| Duration (vs ≤3 months)              | 6, 724          |                     | 0.506 | 55.6%, p = 0.080      | 6, 724          |                     | 0.685 | 63.1%, p = 0.067      |
| 3–6 months                           |                 | -0.83 (-2.24, 0.58) | 0.247 |                       |                 | -1.61 (-5.37, 2.16) | 0.403 |                       |
| >6 months                            |                 | -0.06 (-1.45, 1.33) | 0.930 |                       |                 | -0.20 (-1.74, 1.35) | 0.804 |                       |
| Risk of bias (vs High risk)          | 6, 724          |                     | 0.637 | 50.3%, p = 0.110      | 6, 724          |                     | 0.837 | 63.1%, p = 0.066      |
| Some concerns                        |                 | -0.30 (-1.48, 0.89) | 0.624 |                       |                 | -0.22 (-1.75, 1.31) | 0.778 |                       |
| Low risk                             |                 | -0.56 (-1.73, 0.60) | 0.344 |                       |                 | -0.37 (-2.37, 1.63) | 0.716 |                       |
| <b>Systolic Blood Pressure, mmHg</b> | <b>25, 1932</b> |                     |       | <b>8.6%, p=0.341</b>  | <b>25, 1932</b> |                     |       | <b>8.6%, p=0.341</b>  |
| Mean baseline age, per 10 y          | 25, 1932        | 0.38 (-0.49, 1.24)  | 0.392 | 8.1%, p = 0.349       |                 | -                   | -     | -                     |
| Mean baseline BMI, kg/m <sup>2</sup> | 24, 1903        | 0.02 (-0.29, 0.34)  | 0.882 | 15.1%, p = 0.256      | 24, 1903        | -0.02 (-0.35, 0.32) | 0.922 | 15.7%, p = 0.251      |
| Mean baseline level                  | 24, 1911        | 0.04 (-0.11, 0.18)  | 0.617 | 4.3%, p = 0.402       | 24, 1911        | 0.12 (-0.11, 0.36)  | 0.303 | 4.8%, p = 0.396       |
| Sedentary effectiveness, h/day       | 23, 1882        | -0.48 (-2.16, 1.20) | 0.573 | 7.9%, p = 0.355       | 23, 1882        | -0.71 (-2.64, 1.22) | 0.472 | 11.3%, p = 0.312      |
| Duration (vs ≤3 months)              | 25, 1932        |                     | 0.708 | 14.7%, p = 0.261      | 25, 1932        |                     | 0.743 | 14.0%, p = 0.273      |
| 3–6 months                           |                 | 0.31 (-2.49, 3.10)  | 0.828 |                       |                 | 0.16 (-2.67, 2.99)  | 0.912 |                       |
| >6 months                            |                 | -1.09 (-4.01, 1.84) | 0.466 |                       |                 | -1.19 (-4.13, 1.76) | 0.430 |                       |
| Risk of bias (vs High risk)          | 25, 1932        |                     | 0.375 | 10.8%, p = 0.313      | 25, 1932        |                     | 0.607 | 12.9%, p = 0.288      |
| Some concerns                        |                 | 1.54 (-1.57, 4.65)  | 0.332 |                       |                 | 1.40 (-2.10, 4.90)  | 0.433 |                       |
| Low risk                             |                 | 1.80 (-0.76, 4.36)  | 0.168 |                       |                 | 1.66 (-1.21, 4.53)  | 0.258 |                       |
| <b>HDL Cholesterol, mM</b>           | <b>22, 1760</b> |                     |       | <b>22.5%, p=0.168</b> | <b>22, 1760</b> |                     |       | <b>22.5%, p=0.168</b> |
| Mean baseline age, per 10 y          | 22, 1760        | -0.01 (-0.03, 0.00) | 0.011 | 0.7%, p = 0.450       |                 | -                   | -     | -                     |
| Mean baseline BMI, kg/m <sup>2</sup> | 22, 1760        | 0.00 (-0.01, 0.00)  | 0.304 | 14.3%, p = 0.273      | 22, 1760        | -0.00 (-0.01, 0.01) | 0.768 | 5.2%, p = 0.392       |
| Mean baseline level                  | 21, 1739        | -0.08 (-0.23, 0.08) | 0.344 | 6.3%, p = 0.378       | 21, 1739        | -0.06 (-0.22, 0.09) | 0.428 | 7.4%, p = 0.365       |
| Sedentary effectiveness, h/day       | 21, 1739        | -0.02 (-0.06, 0.01) | 0.222 | 3.3%, p = 0.416       | 21, 1739        | -0.04 (-0.08, 0.00) | 0.046 | 0.0%, p = 0.583       |
| Duration (vs ≤3 months)              | 22, 1760        |                     | 0.266 | 27.6%, p = 0.124      | 22, 1760        |                     | 0.163 | 10.6%, p = 0.325      |
| 3–6 months                           |                 | -0.05 (-0.12, 0.01) | 0.104 |                       |                 | -0.04 (-0.10, 0.02) | 0.175 |                       |
| >6 months                            |                 | -0.02 (-0.08, 0.05) | 0.604 |                       |                 | -0.01 (-0.07, 0.05) | 0.735 |                       |
| Risk of bias (vs High risk)          | 22, 1760        |                     | 0.023 | 9.6%, p = 0.335       | 22, 1760        |                     | 0.035 | 5.2%, p = 0.392       |

|               |  |                      |       |  |  |                     |       |  |
|---------------|--|----------------------|-------|--|--|---------------------|-------|--|
| Some concerns |  | -0.06 (-0.12, 0.00)  | 0.035 |  |  | -0.09 (-0.18, 0.01) | 0.076 |  |
| Low risk      |  | -0.06 (-0.10, -0.01) | 0.015 |  |  | -0.07 (-0.14, 0.00) | 0.043 |  |

Table presents unstandardized regression coefficient (*b*) and 95% confidence interval (CI) and *p* value from meta-regression of controlled trials of adult sedentary behaviour interventions  $\geq 7$  days. Italics indicates overall *p* value (omnibus test). No meta-regression performed for BMI or LDL cholesterol, since  $I^2=0$ .

<sup>a</sup> *k* = total number of interventions included and *n* = total number of individuals analysed in the included interventions, in the meta-regressions or main metaanalysis (boldface) <sup>b</sup> Residual heterogeneity ( $I^2$  and *p* from Cochrane's Q test) with overall heterogeneity in the main metaanalysis shown in boldface
