# Supplementary material for: Effects of sedentary behaviour interventions on biomarkers of cardiometabolic risk in adults: systematic review with meta-analyses
Source: PubMed Central journal article supplement (PMC7841485; doi:10.1136/bjsports-2019-101154), 2020-04-08
Supplement: bjsports-2019-101154supp015.pdf [file bjsports-2019-101154supp015.pdf]

**Supplementary Table S5** Study baseline levels of blood biomarkers (mean  $\pm$  SD) in controlled trials of 34 adult sedentary behaviour interventions  $\geq$ 7 days

| Study                       | TC            | HDL           | LDL           | TG                         | Glucose       | Insulin                      | HbA1c         |
|-----------------------------|---------------|---------------|---------------|----------------------------|---------------|------------------------------|---------------|
|                             | <i>mM</i>     | <i>mM</i>     | <i>mM</i>     | <i>mM</i>                  | <i>mM</i>     | <i>pmol/L</i>                | %             |
| Aadahl et al. (2014)        | 5.3 $\pm$ 1.0 | 1.5 $\pm$ 1.5 | 3.2 $\pm$ 3   | 1.2 $\pm$ 1.1              | 5.6 $\pm$ 1.0 | 52.1 $\pm$ 45                | 5.6 $\pm$ 0.5 |
| Alkhajah et al. (2012)      | 4.5 $\pm$ 0.9 | 1.5 $\pm$ 0.4 | 2.7 $\pm$ 0.7 | 0.9 $\pm$ 0.8              | 4.9 $\pm$ 0.4 |                              |               |
| Ashe et al. (2015)          |               |               |               |                            |               |                              |               |
| Balducci et al. (2019)      | 4.7 $\pm$ 1.0 | 1.2 $\pm$ 0.4 | 2.9 $\pm$ 0.9 | 1.5 $\pm$ 0.9 <sup>a</sup> | 7.6 $\pm$ 2.7 | 77.4 $\pm$ 74.7 <sup>a</sup> | 7.4 $\pm$ 1.5 |
| Biddle et al. (2015)        | 4.9 $\pm$ 1.0 | 1.3 $\pm$ 0.3 | 3.0 $\pm$ 0.7 | 1.5 $\pm$ 1.2              | 4.8 $\pm$ 0.6 | 86 $\pm$ 56.5                | 5.6 $\pm$ 0.3 |
| Butler (2018)               |               |               |               |                            |               |                              | 5.4 $\pm$ 2.5 |
| Carr et al. (2013)          | 4.9 $\pm$ 0.7 | 1.2 $\pm$ 0.5 | 3.0 $\pm$ 0.7 | 1.3 $\pm$ 0.6              |               |                              |               |
| Danquah et al. (2017)       |               |               |               |                            |               |                              |               |
| Dunning (2018)              | 4.8 $\pm$ 0.8 | 1.6 $\pm$ 0.3 | 2.8 $\pm$ 0.7 | 1.0 $\pm$ 0.5              | 4.7 $\pm$ 0.4 | 37.1 $\pm$ 15.2              |               |
| Garland (2018)              |               |               |               |                            |               |                              |               |
| Graves et al. (2015)        | 4.2 $\pm$ 0.9 |               |               | 1.6 $\pm$ 0.7              | 5.1 $\pm$ 0.7 |                              |               |
| Healy et al. (2013)         | 5 $\pm$ 0.9   | 1.5 $\pm$ 0.4 | 2.9 $\pm$ 0.8 | 1.1 $\pm$ 0.5              | 4.8 $\pm$ 0.9 | 52.7 $\pm$ 28.9              |               |
| Healy et al. (2017)         | 5.4 $\pm$ 1.0 | 1.5 $\pm$ 0.4 | 3.2 $\pm$ 0.9 | 1.4 $\pm$ 0.7              | 5.1 $\pm$ 1.4 | 61.4 $\pm$ 112               |               |
| Kallings et al. (2009)      | 5.5 $\pm$ 0.1 | 1.7 $\pm$ 0.1 | 3.3 $\pm$ 0.1 | 1.3 $\pm$ 0.1              | 5.4 $\pm$ 0.1 |                              | 4.9 $\pm$ 0.1 |
| Kozey-Keadle et al. (2014)  | 4.7 $\pm$ 0.8 | 1.7 $\pm$ 0.5 |               | 1.9 $\pm$ 1.2              | 5.8 $\pm$ 0.7 | 133 $\pm$ 86.6               |               |
| Lin et al. (2017)           | 5 $\pm$ 0.9   | 1.5 $\pm$ 0.4 | 2.8 $\pm$ 0.7 | 1.3 $\pm$ 0.7              | 4.8 $\pm$ 0.7 | 42.6 $\pm$ 31.2              |               |
| Lyons et al. (2017)         |               |               |               |                            |               |                              |               |
| MacEwen et al. (2017)       | 5.1 $\pm$ 0.9 | 1.5 $\pm$ 0.4 | 2.9 $\pm$ 0.7 | 1.6 $\pm$ 0.8              | 5.8 $\pm$ 0.5 |                              | 6.9 $\pm$ 0.5 |
| Mainsbridge et al. (2014 )  |               |               |               |                            |               |                              |               |
| Malaeb et al. (2019)        |               |               |               |                            |               |                              |               |
| Mantzari et al. (2018)      | 4.8 $\pm$ 1.0 | 1.4 $\pm$ 0.3 | 2.7 $\pm$ 1.0 | 1.4 $\pm$ 0.6              |               |                              | 5.2 $\pm$ 2.4 |
| Maxwell-Smith et al. (2018) |               |               |               |                            |               |                              |               |
| Maylor et al. (2018)        | 4.4 $\pm$ 0.4 | 1.4 $\pm$ 0.2 |               |                            |               |                              |               |
| Miyamoto et al. (2017)      | 5.3 $\pm$ 0.2 |               | 3.3 $\pm$ 0.2 | 1.2 $\pm$ 0.1              | 7.0 $\pm$ 0.4 |                              | 7.0 $\pm$ 0.2 |
| Pesola et al. (2017)        | 4.8 $\pm$ 0.8 | 1.8 $\pm$ 0.5 | 2.6 $\pm$ 0.9 | 1.0 $\pm$ 0.9              | 5.3 $\pm$ 0.5 | 38.2 $\pm$ 25.6              |               |
| Peterman et al. (2019)      | 4 $\pm$ 0.8   | 1.1 $\pm$ 0.2 | 2.5 $\pm$ 0.7 | 1.2 $\pm$ 0.6              | 4.1 $\pm$ 0.6 |                              |               |

|                                        |           |           |           |           |           |             |           |
|----------------------------------------|-----------|-----------|-----------|-----------|-----------|-------------|-----------|
| Puig-Ribera et al. (2015)              |           |           |           |           |           |             |           |
| Resendiz et al. (2019)                 |           |           |           |           |           |             |           |
| Schuna et al. (2014)                   |           |           |           |           |           |             |           |
| Taylor et al. (2016) - Booster breaks  | 5.0 ± 0.4 | 1.4 ± 0.2 | 2.9 ± 0.3 | 1.4 ± 0.5 | 5.4 ± 2.1 |             |           |
| Taylor et al. (2016) - Computer breaks | 4.8 ± 0.3 | 1.3 ± 0.2 | 2.8 ± 0.3 | 1.3 ± 0.3 | 5.3 ± 1.3 |             |           |
| Thomsen et al. (2016)                  | 5.5 ± 1.3 | 1.5 ± 0.4 | 3.1 ± 1.1 | 1.4 ± 0.7 |           |             | 5.2 ± 0.1 |
| Thomsen et al. (2017)                  | 5.2 ± 1.1 | 1.6 ± 0.5 | 3.1 ± 0.9 | 1.2 ± 0.6 |           |             | 5.5 ± 0.8 |
| Zhu et al. (2018)                      | 4.7 ± 0.7 | 1.6 ± 0.5 | 2.9 ± 0.7 | 1.1 ± 0.6 | 5.4 ± 0.7 | 73.6 ± 41.4 |           |

TC = Total Cholesterol; HDL = High-density lipoprotein cholesterol; LDL = Low-density lipoprotein cholesterol; TG = triglycerides

<sup>a</sup> Different value reported in relation to the interim outcomes in Balducci 2017: 1.8 ± 1.4 mM triglycerides and 89.5 ± 86.4 pM insulin.
