# Supplementary material for: Effects of sedentary behaviour interventions on biomarkers of cardiometabolic risk in adults: systematic review with meta-analyses
Source: PubMed Central journal article supplement (PMC7841485; doi:10.1136/bjsports-2019-101154), 2020-04-08
Supplement: bjsports-2019-101154supp020.pdf [file bjsports-2019-101154supp020.pdf]

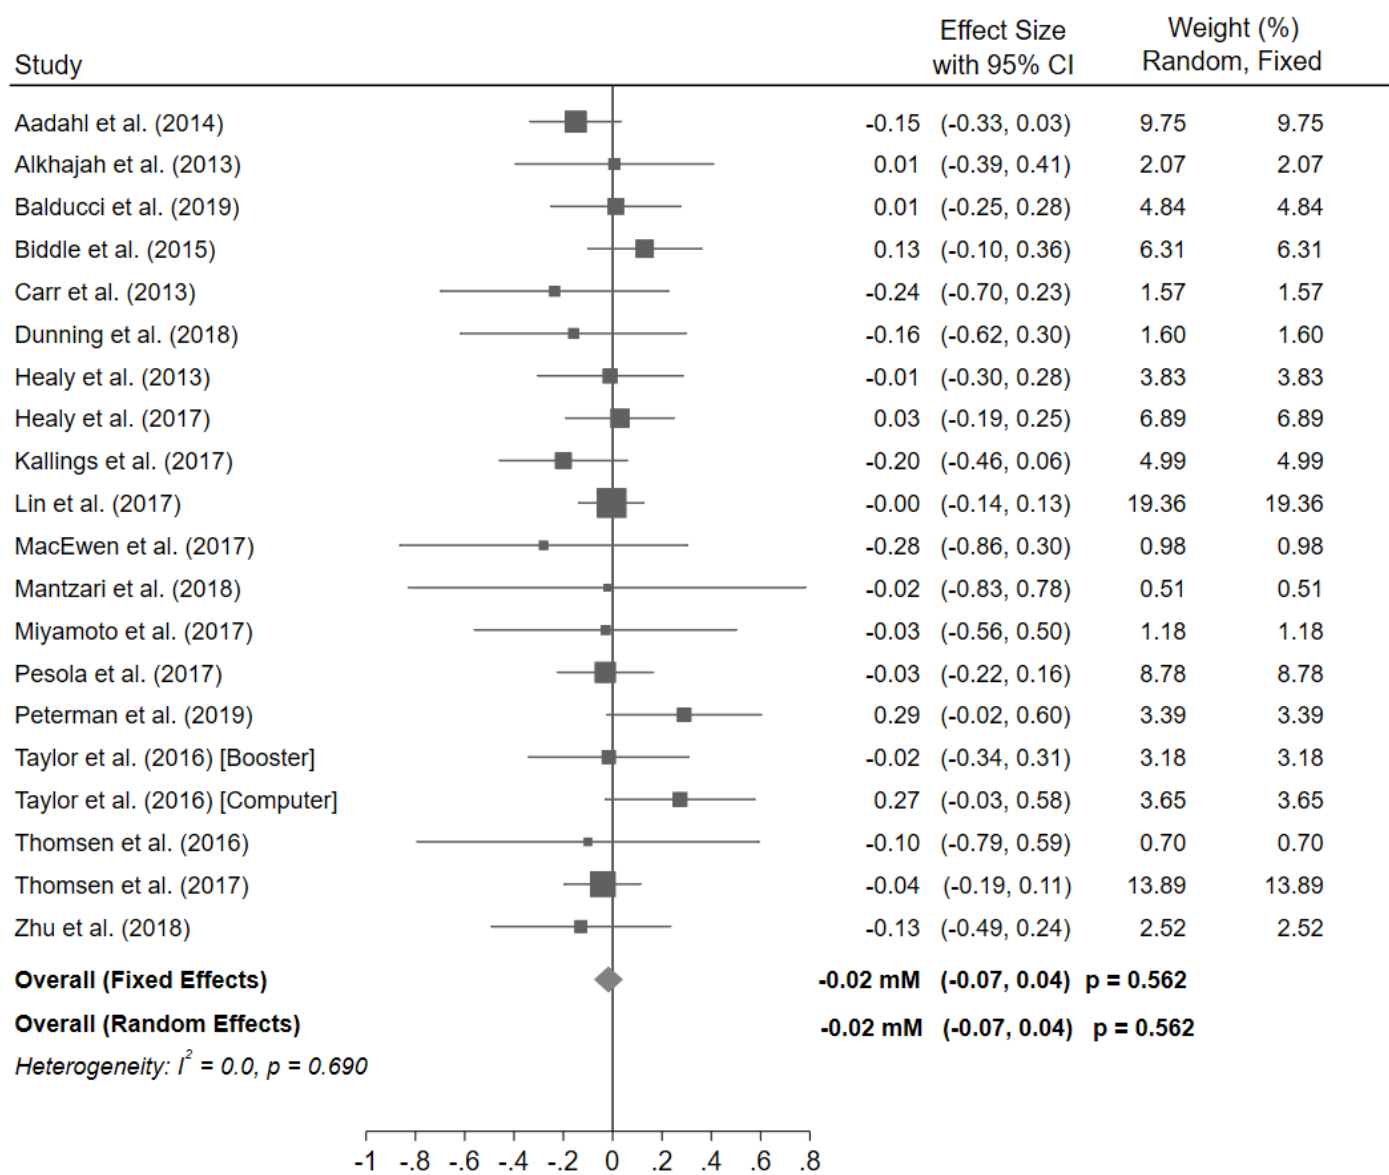

LDL Cholesterol, mM
