# Supplementary material for: Effects of sedentary behaviour interventions on biomarkers of cardiometabolic risk in adults: systematic review with meta-analyses
Source: Br J Sports Med. 2020 Apr 8;55(3):144–54. doi: 10.1136/bjsports-2019-101154 (PMC7841485; doi:10.1136/bjsports-2019-101154)
Supplement: Supplementary data [file bjsports-2019-101154supp003.xlsx]

## Sheet: Table S3
Table S3: Study and intervention characteristics
Study Details			Intervention details
Study (Year); Country	Population	Design*	Duration	ME	Intervention Delivery (setting)**	Sedentary target/messaging	Other behaviours	Primary outcome(s)
Aadahl et al. (2014); Denmark	95F, 71M x̅=52.0 years (18-69) x̅=27.3 kg/m2 (all) Ethnicity not reported Sedentary & Inactive	RCT	6 months	r	I: C/ED (community) -C/ED (4x FtF sessions, each 6 weeks, 30-45 min, nurse delivered) C: Usual conditions	1) Reduce TV 2) Swap sitting with standing 3) break up prolonged sitting via standing 4) All sitting bouts ≤ 30 min	Standing	Sitting time (all)
Alkhajah et al. (2012); Australia	29F, 3M x̅=36.3 years (20-65) x̅=22.1kg/m2 (all) 88% C/W FT workers (office)	nRCT	3 months	r	I: Environmental (workplace) -EM (individual sit-stand workstation) -EM-ED (1x Ftf demonstration [≈2 min] + written instructions on use) C: Usual conditions	Reduce sitting	Standing	Sitting time (work)
Alonso-Dominguez et al. (2019); Spain	93F, 111M x̅= 60.6 years (25-70) x̅= 29.9 kg/m2 (all) Ethnicity not reported Type 2 diabetes	RCT	3 months	9M	I: Multicomponent (primary healthcare) - C/ED (10 min FtF information provision diet/PA; 1 h FtF workshop on use of app) - Structured exercise (5x FtF moderate intensity 4 km walks (1/week for 5 weeks), nurse-delivered) - Device self-monitoring (app; removed at 3 months) C: Usual care: (+ 10 min FtF information provision on diet / PA)	Reduce sedentary time	1) Diet 2) PA (steps, MVPA)	PA (steps)
Ashe et al. (2015); Canada	25F, 0M (women) x̅=64.1 years (55-70) x̅=29.3 kg/m2 (all) Ethnicity not reported Inactive	RCT	6 months	r	I: Multicomponent (community) -C/ED (9x FtF sessions: ≈1h group & ≈10-15 min individual PA prescription delivered by exercise physiologist; + ≈1h group brainstorming delivered by project staff) - Device self-monitoring (Fitbit) C: Attention control (Non-activity health information)	Reduce sitting time	1) PA (total) 2) Various (e.g., diet, bone health, public transport)	Feasibility
Balducci et al. (2019); Italy	116F, 184M x̅= 61.7 years (40-80) x̅=30.1kg/m2 (27-40) Ethnicity not reported Type 2 diabetes Sedentary & Inactive	RCT	36 months	r	I: Multicomponent (primary care) -C/ED (1x FtF session, 30 min, diabetologist-delivered) -Structured exercise (8x FtF sessions 30 min aerobic, 30 min resistance, 15 min warm up/cool down incl. stretching, 'exercise specialist' delivered). C: Usual care	PA instead of sitting time in all settings	PA (LPA, MVPA, resistance)	1) Sitting time (all) 2) PA
Ball et al. (2017); Australia	46F, 36M x̅= ? years (40-65) x̅=30.6kg/m2 (all) Ethnicity not reported Sedentary & Inactive	PP	4 months	r	I: Multicomponent (community) - C/ED (1 x Tel session, research staff delivered, 20 min) -SMS goals, prompts (≈16 at 1/week) -Financial incentives (dependent on goal attainment) -Device self-monitoring (Fitbit)	Reduce sitting time (particularly during leisure but also at work)	PA (total)	PA
Bergman et al. (2018); Sweden	44F, 36M x̅= 51.4 years (40-67) x̅= ? kg/m2 (25-40) Ethnicity not reported Workers (office, have sit-stand desk, sedentary work tasks) Inactive (limited aerobic training)	RCT	13 months	r	I1: Multicomponent (workplace) - EM: Treadmill workstation - C/ED: (1x FtF nurse-delivered health consultation including SB, diet and PA), 4x emails (sedentary behaviour & treadmill use) C: Usual care (+1x FtF nurse-delivered health consultation PA, diet)	Reduce sedentary time using treadmill (self-selected walking speed, ≥1 h/day)	1) PA (walking) 2) Diet	PA (weekday & weekend walking, activPAL)
Biddle et al. (2015); UK	128F, 59M x̅=32.8 years (18-40) x̅=34.6 kg/m2 (≥25)*** 80% C/W At risk for type 2 diabetes or obese***	RCT	12 months	r	I: Multicomponent (community) - C/ED (1x FtF group structured education workshop, 3h +1x Tel call, [duration unknown]) -Device self-monitoring (Gruve) C: Attention control (information leaflet on diabetes, PA and sedentary)	Reduce sedentary behaviour	Standing	Sitting time (all)
Butler et al. (2018); USA	8F, 13M x̅= 22.7 years (≥18) x̅= 23.0 kg/m2 (all) 71.4% C/W / 23.8% Black / 4.8% Hispanic University students ≥5 h/week in a specific building	RCT-x	3 weeks	r	I: Environmental (university) -EM: Shared standing desks (classroom) C: Usual conditions	Replace classroom sitting with standing, ≈5 h /week	Standing	Cardiometabolic biomarkers
Carr et al. (2013); USA	36F, 4M x̅=44.7 years (adults) x̅=32.4 kg/m2 (≥25) 70% C/W FT workers (desk) Inactive	RCT	12 weeks	r	I: Multicomponent (workplace) -C/ED (website messaging: motivational including prompting, 1 message /day + 3 emails/week, ≈120 total) -EM (individual portable pedal machine with PC software) -EM-ED (researcher-assisted setup & instruction on use + website prompts for usage) - Device self-monitoring & social comparison (pedometer challenge) C: Usual conditions (waitlisted for I)	Reduce sedentary time	1) Standing 2) PA (steps, pedalling)	1) Sitting time (all) 2) PA
Danquah et al. (2017); Denmark & Greenland	210F, 107 M x̅=46 years (19-64) x̅=26 kg/m2 (all) Ethnicity not reported FT workers (office)	c-RCT	3 months	r	I: Multicomponent (workplace) -EM (general walking routes + shared high tables) -C/ED (FtF 1x 15 min lecture & workshop [duration unknown]) -Online/SMS support (weekly emails or 2/week SMS, ≈12-24 total) C: Usual conditions	Reduce sitting time	1) Standing 2) PA (steps)	Sitting: time, prolonged time, accumulation (work)
Dunning et al. (2018); South Africa	12F, 8M x̅= 27.5 years (18-45) x̅= 23.8 kg/m2 (≤30) Ethnicity not reported Workers (desk, sedentary at work)	RCT	10 weeks	r	I: Environmental (workplace) SMS prompts / reminders: (every 30 min during work hours) C: Usual conditions	Break up prolonged sitting	Short bouts LPA (standing or ambulatory)	Sedentary or sitting time (activPAL and actiGraph <100 counts/min)
Eakin et al. (2014); Australia	132F, 170M x̅=58.0 years (20-75) x̅=33.1 kg/m2 (25-45) 87% C/W Type 2 diabetes Inactive	RCT	18 months	6M	I: C/ED (community) -C/ED only (4x weekly + 5x fortnighly + 12x monthly calls, 20-30 min) C: Usual care	1) Sit less 2) Break every 30 min 3) ≤2 h non-work screen time	1) Diet 2) Weight loss 3) PA (MVPA, resistance)	1) PA 2) Weight 3) HbA1c
Garland et al. (2018); USA	27F, 40M <40 years (63%) x̅= 24.8 kg/m2 (all) Ethnicity not reported Workers (office)	c-RCT	12 months	r	I: Multicomponent (workplace) -EM (individual sit-stand workstation) - C/ED (1x FtF group structued education session + ergonomic education on workstation) C: Usual care (same group session as I, information only)	Reduce prolonged sitting	Increase movement	None stated
Gill et al. (2019); Canada	93F, 25M x̅= 57.7 years (18-85)* x̅≈ 31.4 kg/m2 (>25*) 98% C/W At risk for CVD (1+ out of: >25 kg/m2, sedentary ≥3h/d, inactive <150 min/wk MVPA, < 8 fruit & veg serves/day, type 2 diabetes)	RCT	6 months	6M (app & Online tools only)	I: C/ED (community) -C/ED (Online & app supported health coaching with exercise prescription & SB advice (4x FtF sessions [≈30-40 min] at 0, 2, 4, 6 months), telephone coaching, app-based virtual coaching) -Device, app & web-based self-monitoring, networking/support & social comparison C: Usual conditions (waitlisted for I until 6 months)	Reduce sedentary time	1) PA (steps, MVPA) 2) Diet	PA (step count)
Graves et al. (2015); UK	37F, 10M x̅=38.6 years (≥18) x̅=24.8 kg/m2 (all) 96% C/W FT workers (office)	RCT	8 weeks	r	I: Environmental (workplace) -EM (individual sit-stand workstation) -EM-ED (Manufatcturer brief FtF demonstration + web information, ergonomics only) C: Usual conditions	Reduce workplace sitting	Standing	Sitting time (work)
Harris et al. (2017); UK	32F, 18M x̅=42.0 years (≥18) x̅=40.7 kg/m2 (≥30) 96% C/W Intellectual disabilities	c-RT	12 months	r	I1: Multicomponent (community) -C/ED (9-12x initial + 6x maintenance FtF sessions with participant & carer, 40-60 min, delivered by dietician & health professional) -Device self-monitoring (pedometer) I2: Alternate Intervention: Weight loss heath education ("Weight Watchers Too")	Reduce sedentary behaviour	1) Diet 2) Weight loss 3) PA (LPA, MVPA)	Weight
Healy et al. (2013); Australia	24F, 19M x̅=43.2 years (18-65) x̅=26.8 kg/m2 (all) 88% C/W FT workers (office)	nRCT	4 weeks	r	I: Multicomponent (workplace) -C/ED (1x FtF session 30 min including EM setup & demonstration & 3x Tel calls, weekly 7-10 min) -Device feedback (1x, activPAL, accelerometer) -EM (individual sit-stand workstation) -Organisational (emails, 1x educational workshop generating strategies) C: Usual conditions	1) Stand Up every ≤30 min 2) Sit Less via workstation, gradually aiming ≈50/50 sitting with frequent postural change 3) Move More via incidental PA	1) Standing 2) PA (incidental PA, predominantly LPA)	Sitting time (work)
Healy et al. (2017); Australia	158 F, 73 M x̅=45.6 years (18-65) x̅=28.6 kg/m2 (all) 80% C/W FT workers (office)	c-RCT	12 months	9M non-contact (EM only)	I: Multicomponent (workplace) -C/ED (1xFtF session 30 min including EM setup & demonstration + 4x Tel health coaching calls, 7-10 min, tapered: first 3M) -Organisational support (1x workshop generating strategies + 6x workplace-delivered emails: first 3M) -Device feedback (1x, activPAL, accelerometer) -EM (individual sit-stand workstation) C: Usual conditions	At work & elsewhere to: reduce sitting and reduce prolonged sitting in ≥30 min bouts. Target: Gradually aiming ≈50/50 sitting / not	1) Standing 2) PA (LPA primarily)	Sitting time (work)
Igelstrom et al. (2014); Sweden	24F, 86M x̅=55 years (adults) x̅=34.4 kg/m2 (≥25) Ethnicity not reported Obstructive sleep apnoea Inactive	RCT	18 months	r	I: C/ED only (hospital) -C/ED (14 FtF sessions [duration unknown], tapered, covering PA, diet & CPAP use - dietician & physiotherapist delivered) C: Usual care (CPAP instruction)	Reduce sedentary time	1) Diet 2) PA (LPA, MVPA) 3) CPAP use	1) PA (MVPA) 2) Diet
John et al. (2011); USA	7 F, 5M x̅=46.2 years (20-65) x̅=33.9 kg/m2 (>28) Ethnicity not reported Workers (office)	PP	9 months	r	I: Environmental (workplace) -EM (individual treadmill desk)	Replace desk-sitting with treadmill stepping (self-directed amount & speed)	PA (stepping)	None stated
Kallings et al. (2009); Sweden	58 F, 43 M x̅≈68 years (67-68) x̅=30.1kg/m2 (25-40) Ethnicity not reported Inactive	RCT	6 months	r	I: Multicomponent (primary care) -C/ED (1x 30-min FtF session PAP & Counselling, lecture, Tel follow-up - health-professional delivered) - Device self-monitoring (pedometer) C: Usual care (+written materials about health & PA)	Reduce sedentary time	PA (MVPA, resistance, flexibility/ balance)	PA
Koepp et al. (2013); USA	25F, 11M x̅=42 years (adults) x̅=29 kg/m2 (all) Ethnicity not reported Workers (desk)	PP	12 months	r	I: Environmental (workplace) -EM (individual treadmill desk)	Replace desk-sitting with treadmill stepping (self-directed)	PA (stepping)	PA
Kozey Keadle et al. (2014); USA	39F, 19 M x̅=43.6 years (20-60) x̅=35.1 kg/m2 (all) Ethnicity not reported Workers (sedentary at work) Inactive	≈RCT & ≈RCT-x (4 arm)	12 weeks	r	I1: Multicomponent (community) - C/ED (12x FtF sessions, [duration unknown], covering sedentary behaviour & non-exercise activity. Told not to exercise.) - Device self-monitoring (pedometer) I2-3:Alternate interventions: exercise, exercise & sedentary behaviour C: Usual behaviour	Decrease sedentary time (home & work) by increasing non-exercise activity and do not exercise [I1].	PA (LPA, steps)	Cardio-respiratory fitness
Lai et al. (2019); China	37F, 19M x̅=? years (≥18) x̅=? kg/m2 (all) ?% Chinese Workers	PP	3 months	r	I: C/ED only (workplace) - C/ED (1 x 3 h FtF session initially, 1 x 1 h FtF session at 1 month) - Structured exercise (unsupervised, demonstration only as part of C/ED)	Reduce sedentary behaviour	1) PA (Zero-time strength and stamina exercises)	1) PA (engagement with zero-time strength and stamina exercises)
Lin et al. (2017); Taiwan	52F, 47M x̅=49.5 years (≥20) x̅=24.0 kg/m2 (all) Ethnicity not reported FT workers (sedentary job)	c-nRCT	12 weeks	r	I: Multicomponent (workplace) - C/ED (3x newsletters; handbook w/ goal setting & relapse prevention) - Device self-monitoring & social comparison (team pedometer challenge each 2 weeks) -Computer prompt (break hourly) -EM (walking routes, maps, signage, prompts) C: Usual conditions (+newsletter)	Sit less, walk more	PA (steps)	1) Sitting time (work, all) 2) PA 3) Cardio-metabolic biomarkers 4) Work productivity
Lyons et al. (2017); USA	34F, 6M x̅=61.5 years (55-79) x̅=30.3 kg/m2 (25-35) 65% C/W, 13% Black, 15% Other, 28% Hispanic Inactive	RCT	12 weeks	r	I: Multicomponent (community) - C/ED (12x Tel calls, weekly, 15-20min, behavioural counsellor) -Device self-monitoring & social comparison (Jawbone Up/app) C: Usual conditions	Reduce prolonged sedentary bouts (bout goal 1 h suggested, negotiated)	PA (steps)	Feasibility
MacEwen et al. (2017); Canada	23F, 5M x̅= 45.5 years (18+) x̅= 35.8 kg/m2 (WC >= central obesity) Ethnicity not reported FT worker (desk)	RCT	12 weeks	r	I: Environmental (workplace) -EM (individual sit-stand workstation) -EM-ED (instructed to sit or stand as desired and exercise as normal) C: Usual conditions	No messaging: sit or stand as much as desired	Standing	Not stated
Mailey et al. (2016); USA	49F, 0M (women) x̅=38.7 years (≥21) x̅=? kg/m2 (all) 84% C/W FT workers (sedentary job) Inactive	RT	8 weeks	r	I: C/ED (workplace) -C/ED (1x FtF session covering strategies, 1x Tel follow-up, self-monitoring)	Decrease sedentary time by 30 min workday with breaks of 1-2 min each half hour (short breaks) or 2x 15 min breaks (long breaks)	PA (LPA, MVPA)	Sitting time (work)
Mainsbridge et al. (2014); Australia	24F, 5M x̅=40.2 years (adults) x̅=? kg/m2 (all) Ethnicity not reported FT workers (desk)	RCT	13 weeks	r	I: Environmental (workplace) - Computer prompts only (interactive computer software) C: Usual conditions (+ 1x information session)	Break up prolonged sitting every 45 min with short bursts of NEPA	PA (non-exercise PA, especially LPA)	Mean arterial pressure
Malaeb et al. (2019); USA	23F, 2M x̅=47.7 years (>18) x̅=28.5 kg/m2 (all) Ethnicity not reported Workers (Sedentary job 'mostly sitting')	RCT-x	2 weeks	r	I: Environmental (workplace) -EM (shared treadmill desks) -EM-ED (demonstration, leaflet, self-monitoring, adherence checks) C: Usual conditions	Reduce sitting by using treadmill desk 2.5 h/d, 5 d/week	1) PA (walking; Non Exercise Activity Thermogenesis)	Not stated
Mantzari et al. (2018); UK	≈ 11 F, 9M (n=18, 61% F) x̅=43.4 years (adult) x̅=25.1 kg/m2 (all) Ethnicity not reported ≥0.6 FT workers (office, doing ≥70% work at same desk)	RCT	3 months	r	I: Multicomponent (workplace) -EM (individual sit-stand workstation) -EM-ED (demonstration by research staff + instructional leaflet, self-monitoring use by diary) C: Usual conditions (+ brief information prolonged sitting)	Break up prolonged sitting time	1) Standing	Feasibility
Maxwell-Smith et al. (2019); Australia	34F, 34M x̅=64.1 years (18-80) x̅=28.3 kg/m2 (all) 97.1% C/W Stage 1-2 colorectal or endometrial cancer survivors completed active treatment last 5 y, at CVD risk Inactive (<150 min/wk MVPA)	RCT	12 weeks	r	I: Multicomponent (community) - C/ED (2x 2-hour Ftf group sessions at wk 1 and 4, delivered by health psychologists specialising in behaviour change for device setup, PA messaging, goal setting/planning, self-monitoring, exercise coaching, 1 x 20-min Tel call at week 8) - Device self-monitoring & Prompts (Fitbit Alta) C: Usual conditions (+ brief written materials on PA guidelines, example exerci…	Reduce bouts of sedentary behaviour	1) PA (steps, MVPA) 2) Strength exercises (home based)	PA (MVPA)
Maylor et al. (2018); UK	51F, 38M x̅=43.4 years (18-70) x̅=25.9 kg/m2 (all) 83.3% C/W, 16.7% black & minority Workers (office, same desk ≥3 d/wk, sedentary at work)	c-RCT	8 weeks	r	I: Multicomponent (workplace) -C/ED (1x group FtF initial, 1 x individual FtF (20 min)), weekly Tel calls (5-10 min) by research staff) -Device self-monitoring & social comparison (pedometer step challenge) -Device prompts (self-selected computer software or app) -Financial incentives (shopping vouchers) -EM (signage prompts about sitting and PA, self-selected strategies: moving equipment further…	Reduce sedentary behaviour at work	1) PA (especially ambulation)	Workplace sitting (activPAL)
Miyamoto et al. (2017); Japan	6F, 25M x̅= 61.8 years (adults) x̅= 24.8 kg/m2 (all) Ethnicity not reported Type 2 diabetes	RCT	12 weeks	r	I1: Multicomponent (hospital) -C/ED (3x sessions, likely FtF, [duration unknown]: advice by physical therapist to increase non-locomotive PA) -Device self-monitoring (accelerometer) I2: Multicomponent (hospital) -as per I1 but targeting locomotive PA C: Usual Care (waitlisted for I)	Reduce sedentary time by increasing non-locomotive PA (I1) or locomotive PA (I2)	PA (non-locomotive PA [I1] or locomotive PA [I2])	1) Fasting glucose 2) HbA1c
Morgan et al. (2013); Australia	0F, 159M x̅=47.5 years (18-65) x̅=32.7 kg/m2 (25-40) Ethnicity not reported	RCT (3 arm)	3 months	3M	I1 Multicomponent (community) -C/ED (resource provision: 1x 25-min DVD, handbook, support book) -Device self-monitoring (pedometer) I2 Multicomponent (community) -I1 components -C/ED (website delivered education, 7x emails) -Website/app self-monitoring (CALORIEKING) C: Usual conditions	Reduce sitting time	1) Diet 2) PA (steps)	Weight
Overgaard et al. (2017); Denmark	29F, 14M x̅= 45.8 years (20-65) x̅= 32.9 kg/m2 (>30 or WC > central obesity) Ethnicity not reported Inactive	RT	4 weeks	r	I1: C/ED (community) - C/ED (1x FtF session [duration unknown]: advice to sit less) I2: Alternate Intervention (MVPA)	Reduce sedentary behaviour	PA (non-sedentary [I1]; MVPA [I2])	1) Sitting time (all) 2) PA
Pesola et al. (2017); Finland	75F, 58M x̅= 37.4 years (28-53) x̅= 24.5 kg/m2 (≤35) Ethnicity not reported Workers (sedentary at work, with kids 3-8y)	c-RCT	6 months	6M	I: C/ED (community) C/ED (1x 30 min lecture + 1x FtF session 30-60 min, 2x Tel calls, behavioural counsellor delivered) C: Usual conditions (+ delayed short version of the C/ED)	Reduce and break up sedentary time	PA (LPA)	Sitting: time, accumulation (all)
Peterman et al. (2019); USA	14F, 7M x̅=34.8 years (18-55) x̅=28.3 kg/m2 (all) Ethnicity not reported FT workers (office, ≥ 6 h/d sedentary at work) Inactive (<5 h/wk MVPA)	RCT	4 weeks	r	I: Environmental (workplace) -EM (individual underdesk stationary cycle) -EM-ED (FtF: Initial advice on cycle use, self-monitoring + weekly adherence checks by research staff) C: Usual conditions	Reduce and break up sedentary behaviour at work, replacing 15 min / h with stationary cycling (≈2 h/d)	1) PA (stationary cycling)	1) VO2 max 2) 2-h postprandial glucose
Prince et al. (2018); Canada	15F, 23M x̅=62.0 years (≥18) x̅=29.7 kg/m2 (all) Ethnicity not reported Coronary artery disease enrolled in cardiac rehabilitation	RT	8 weeks	r	I1: Multicomponent (hospital) - Device prompts (VTAP thigh-worn monitor) - Structured exercise (cardiac rehabilitation) (2x FtF on-site 1-hour aerobic and strength exercise sessions, physiotherapist delivered). - C/ED (no sedentary component, but optional nutrition counseling, smoking cessation, diabetes and stress management, and psychosocial support) I2: Alternate intervention (cardiac rehabili…	Device prompts to break up prolonged sitting every 30 min with >2 min standing/movement during waking hours	1) PA (MVPA, resistance), 2) Diet	Recruitment, acceptability, completion, adherence rates
Puig-Ribera et al. (2015); Spain	171F, 93M x̅=42 years (adults) x̅=25.7 kg/m2 (all) Ethnicity not reported Workers (office) Inactive	c-RCT	19 weeks	10 weeks	I: Multicomponent (workplace) - C/ED (website-delivered education +6 x emails, tapered) - Social support (blog) - Device self-monitoring (pedometer) C: Usual conditions	Decrease occupational sitting via incidental walking, then short walks, then long walks	PA (LPA, steps)	1) Sitting time (work) 2) PA (steps)
Reeves et al. (2017); Australia	90F, 0M (female) x̅=55.3 years (18-75) x̅=31.0 kg/m2 (≥ 25) Ethnicity not reported Breast cancer	RCT	6 months	r	I: Multicomponent (community) - C/ED (16x 30 min Tel calls, tapered, delivered by dieticians trained in behavioural counselling) - Device self-monitoring (pedometer) C: Usual care	1) Reduce prolonged sedentary time 2) <2h/day non-work screen time	1) Diet 2) PA (MVPA)	Weight
Resendiz et al. (2019); USA	28F, 7M x̅=? years (≥18) x̅=32.2 kg/m2 (≥25) Ethnicity not reported Workers (sedentary at work)	RCT	6 months	r	I: Environmental modification (workplace) EM (sit-stand workstation, with anti-fatigue mat, installed or checked by ergonomics staff) ED-EM (self-monitoring desk use and energy output, instruction on desk use)	Reduce sitting by use of desk, no target but starting at 10 min/h standing	1) Standing (desk)	None stated
Rosenberg et al. (2015); USA	17F, 8M x̅=71.4 years (>60) x̅=34.1 kg/m2 (≥27) 91% C/W Sedentary	PP	8 weeks	r	I: C/ED (community) - C/ED only (5x Tel calls, 20-30 min, tapered delivered by 'health coach')	1) Reduce sitting time by 2 h/day via standing & moving 2) 15 more sit-stand transitions/day	1) Standing 2) PA (steps)	Sitting: time, accumulation (all)
Schuna et al. (2014); USA	40F, 1M x̅=40.1 years (adults) x̅=35.8 kg/m2 (≥25) 20% C/W, 76% African American, 5% 'Other' Workers (desk, office)	RCT	3 months	r	I: Multicomponent (workplace) -EM (shared treadmill desks) -EM-ED (instruction on amout of use, online support: scheduled use with message reminders) C: Usual conditions	Reduce work sitting time via treadmill-desk use (2x/workday, 45 min/session).	PA (LPA, steps)	1) Sitting: time, accumulation (work) 2) PA (total)
Steeves et al. (2012); USA	46F, 12M x̅=52.0 years (35-65) x̅=33.5 kg/m2 (25-45) 97% C/W, 3% African American Sedentary	RT	6 months	r	I1: Multicomponent (domestic) -C/ED (3x monthly Ftf sessions, 3 x monthly Tel calls, newsletters) -Device self-monitoring (pedometer) I2: Alternate intervention (Walking) -C/ED (3x monthly Ftf sessions, 3 x monthly Tel calls, newsletters)	Replace TV sitting with TV stepping at moderate pace (100-120 steps/min) during commercials of 30-90 min of TV ≥5x/week	PA (steps)	1) Feasibility 2) PA (total, steps) 3) Sitting (TV time; all)
Taylor et al. (2016); USA	152F, 33M x̅=43.4 years (≥18) x̅=30.3 kg/m2 (all) 35% African American / 33% Non-Hispanic white / 32% Hispanic FT workers (sedentary worksites)	c-RCT (3 arm)	6 months	r	I1: Structured 'exercise' class (workplace) -Structured 'exercise' at work (1x 15 min session/day, peer led) I2: Environmental (workplace) - Computer prompts (3 min breaks 5x day) C: Usual conditions	Replace 15 min/day sitting with the breaks	PA (LPA, resistance, stretching)	None stated
Thomsen et al. (2016); Denmark	12F, 8M x̅=59.3 years (≥18) x̅=25.5 kg/m2 (all) Ethnicity not reported Rheumatoid arthritis Sedentary & Inactive	RCT	16 weeks	r	I1: Multicomponent (hospital) -C/ED (3x FtF sessions, 29-102 min, delivered by nurses trained in behavioural counselling) - SMS prompts & goal reminders (tailored, self-selected dose ≤5/week) C: Usual care	1) Swap sitting with standing at work & home 2) Reduce TV 3) Reduce prolonged sitting via standing 4) all sitting bouts <30 min	Standing	Feasibility
Thomsen et al. (2017); Denmark	121F, 29M x̅= 59.6 years (adults) x̅= 26.4 kg/m2 (all) Ethnicity not reported Rheumatoid arthritis Sedentary & Inactive	RCT	16 weeks	r	I: Multicomponent (hospital) - C/ED (3x FtF sessions, 60-90 min, delivered by nurse/occupational therapist trained in behavioural counselling) - SMS prompts & goal reminders (tailored, self-selected dose) C: Usual care	1) Reduce TV 2) Swap sitting with standing 3) break up prolonged sitting via standing 4) All sitting bouts ≤ 30 min	Standing	Sitting time (all)
van der Pligt et al. (2018); Australia	160F, 0M (women) x̅= 32.8 years (≥18) x̅= 26.0 kg/m2 (all) Ethnicity not reported Mothers	nRCT (3 arm)	9 months	r	I1: Multicomponent (community) -C/ED (3x Tel calls, 30 min, dietitian delivered) -Device self-monitoring (pedometer & CALORIEKING site/app for diet) -Online support (behaviour therapy website for diet/PA & social support via discussion board) I2: Alternate intervention -C/ED (child behaviour: separate study) C: Usual care (separate study)	Reduce sitting time at home and work	1) Diet 2) PA (incidental PA, planned walking, structured exercise)	1) Weight 2) Waist circumference
Verweij et al. (2012); Netherlands	194F, 329M x̅=47 years (adults) x̅=27.7 kg/m2 (WC ≥overweight***) 89% Dutch nationality Workers Inactive***	c-RCT	6 months	r	Multicomponent (workplace) - C/ED (5x 20-30 min FtF counselling sessions, Occupational physician-delivered- choice of PA, diet or sedentary behaviour) -Device self-monitoring (pedometer) - EM (workplace audit / employer-negotiated change) C: Usual conditions (occupational physician delivered health risk assessment and advice)	Decrease sedentary behaviour (or work on one of the other behaviours)	1) Diet 2) PA (MVPA)	1) Waist circumference 2) PA (implied MPA, VPA) 3) Diet
Wyke et al. (2019); UK, the Netherlands, Norway, Portugal	0F, 1,113M (men) x̅=45.8 years (30-65) x̅=33.2kg/m2 (≥27 kg/m2) 90% 'native' to study country	RCT	12 weeks	9M	I: Multicomponent (community) - C/ED/Structured exercise: 12x 90 min structured exercise session using behaviour change techniques, delivered by football coaches - Device self-monitoring, social comparison, reminders: (SitFIT device + social media support + game-based app) C: Usual conditions (waitlist for I)	Reduce sedentary time	1) PA (MVPA) 2) Diet	1) Sedentary time 2) PA
Yang et al. (2017); Taiwan	32F, 21M x̅= 33.2 years (20-56) x̅= 28.8 kg/m2 (≥24***) Ethnicity not reported Metabolic abnormalities***	RCT-x	6 months (3 months I & 3 months C)	r	I: Multicomponent (primary care) - C/ED (12x 'Line' and email contacts, weekly, with health professional advice, information and reminders + website information) - Device self-monitoring, social comparison, reminders (sensor + smartphone app + website) C: Usual care (booklet with health information)	Sedentary time < 8h	1) Diet 2) Sleep 3) PA (total)	1) Sitting time (all) 2) PA
Zhu et al. (2018); USA	27F, 9M x̅= 39.1 years (18-65) x̅= 25.8 kg/m2 (all) 75% C/W FT workers	nRCT	18M	14M non-contact (EM only)	I: Multicomponent (workplace) - C/ED (4 months: worksite staff-delivered emails, promotional flyers, e-newsletters) -EM (18 months: individual sit-stand workstation + shared treadmill desks) C: Usual conditions (+ e-newsletters on energy, ergonomics and mindfulness, delivered by worksite staff)	Reduce sedentary behaviour (use sit-stand workstation and treadmill workstation)	1) PA (via treadmill desk) 2) Standing (via workstation)	Workplace sitting
Footnotes: ME = maintenance evaluation; F = female; M = male; I = intervention; C = control; FT=full-time; PA = Physical activity; LPA = light PA; MVPA = moderate-vigorous PA; MPA = moderate PA; VPA = vigorous PA; C/W = Caucasian/White as reported by study (Caucasian, White, British White, non-Hispanic White) ; ?= Data unreported.
*Study designs: c- = cluster, n = non, R = randomised, C = controlled, T = Trial, -x = crossover, PP = pre-post study (single arm).
**Intervention components: C/ED = counselling/education; EM = environmental modification; FtF = face-to-face; Tel = Telephone SMS = short message system.
***Criteria only required if other criteria are not met. Must be: overweight and at risk for type 2 diabetes and/or obese BMI (≥27.5 for South Asians otherwise ≥30 kg/m2) (Biddle); inactive and/or BMI >=25 (Eakin); insufficiently inactive and/or >=overweight WC and/or not meeting diet recommendations (Verweij); above the threshold for BMI or one of the other 5 cardiometabolic biomarker risk facto…
Resendiz et al. (2019) average age is median
